# Supplementary material
Source: PubMed Central journal article supplement (PMC1414787)
Supplement: NIHMS5994-supplement-supp.pdf [file NIHMS5994-supplement-supp.pdf]

## Online Supplement

Childhood exposure to environmental tobacco smoke and chronic respiratory symptoms in nonsmoking adults: The Singapore Chinese Health Study

Gloria L. David<sup>1</sup>, Woon-Puay Koh<sup>2</sup>, Hin-Peng Lee<sup>2</sup>, Mimi C. Yu<sup>3</sup>, Stephanie J. London<sup>1</sup>

## Appendix 1

Sections from the Singapore Chinese Health Study Questionnaire

### PASSIVE SMOKING

1. From your birth to age 18, did anyone living in your home smoke cigarettes at home on a daily basis for six months or longer?
  - a. Who smoked daily at home? (Mark all that apply)
    - i. Father
    - ii. Mother
    - iii. Grandparent(s)
    - iv. Sibling(s)
    - v. Other person(s)
  - b. From your birth to age 18, for how many years did at least one person living in your home smoke daily at home?
    - i. 1 year or less
    - ii. 2-5 years
    - iii. 6-11 years
    - iv. 12 + years

2. Since you were 18 years old, has there ever been anyone living in your home who smoked cigarettes at home on a daily basis for six months or longer?
  - a. Who smoked daily at home? (Mark all that apply)
    - i. Spouse
    - ii. Parent(s) and/or in-law(s)
    - iii. One or more of your children
    - iv. Other person(s)
  - b. Since you were 18 years old, for how many years has at least one person living in your home smoked daily at home?
    - i. 1 year or less
    - ii. 2-4 years
    - iii. 5-14 years
    - iv. 15-24 years
    - v. 25 + years
3. Does anyone who currently lives in your home smoke at home on a daily basis
  - a. Who currently smokes daily in your home? (Mark all that apply)
    - i. Spouse
    - ii. Parent(s) and/or in-law(s)
    - iii. One or more of your children
    - iv. Other person(s)
4. Have you ever had a job in which, on a daily basis, you were close enough to cigarette smoke that you could smell the smoke?

- a. For how many years were you exposed to cigarette smoke like this at work?
    - i. < 1 year
    - ii. 2-4 years
    - iii. 5-9 years
    - iv. 10-19 years
    - v. 20 + years
  - b. On average, for how many hours per day were you exposed to cigarette smoke like this at work?
    - i. < 1 hour
    - ii. 1-3 hours
    - iii. 4 + hours
5. Are you currently exposed to cigarette smoke at work on a daily basis?

#### HISTORY OF RESPIRATORY DISEASES (American Thoracic Society, 1995) [1]

#### COUGH

1. Do you usually cough when you get up in the morning? (Exclude clearing of the throat)
2. Do you usually cough at all during the rest of the day or at night?
3. Do you usually cough for 3 months or more during the year?
4. For how many years have you had this cough?
  - a. < 1 year
  - b. 1-2 years
  - c. 3-5 years

- d. 6-9 years
- e. 10 + years

#### SPUTUM / PHLEGM

1. Do you usually bring up phlegm from your chest when you get up in the morning?  
(Exclude phlegm from the nose, count phlegm swallowed)
2. Do you usually bring up phlegm from your chest during the rest of the day or at night?
3. Do you usually bring up phlegm from your chest on most days for three months or more during the year?
4. For how many years have you had trouble with phlegm?
  - a. < 1 year
  - b. 1-2 years
  - c. 3-5 years
  - d. 6-9 years
  - e. 10 + years

#### ASTHMA

Have you ever been told by a doctor that you had asthma?

1. At about what age did your asthma start?
2. Have you had an attack of asthma at any time in the past 12 months?
3. How old were you (approximately) when you had your last asthma attack?

Reference:

1 Ferris BG. Epidemiology Standardization Project (American Thoracic Society). *Am Rev Respir Dis* 1978;118:1-120.

Appendix 2 Recent cough and/or phlegm in relation to environmental tobacco smoke (ETS) exposure

|                                      | <b>Recent Cough and/or Phlegm</b> |                     |
|--------------------------------------|-----------------------------------|---------------------|
|                                      | <b>N</b>                          | <b>OR (95% CI)*</b> |
| <b>Childhood home ETS exposure †</b> |                                   |                     |
| None                                 | 389                               | 1.00                |
| 1 Smoker ‡                           | 473                               | 1.17 (1.00 - 1.36)  |
| 2 Smokers                            | 318                               | 1.20 (1.01 - 1.43)  |
| 3 or more Smokers                    | 140                               | 1.16 (0.93 - 1.45)  |
| 1 or more Smokers                    | 931                               | 1.18 (1.02 - 1.36)  |
| <b>Adult home ETS exposure §</b>     |                                   |                     |
| None                                 | 305                               | 1.00                |
| 1 Past Smoker                        | 422                               | 1.18 (0.99 - 1.39)  |
| 2 or more Past Smokers               | 312                               | 1.29 (1.06 - 1.57)  |
| 1 or more Current Smokers            | 281                               | 1.39 (1.16 - 1.68)  |
| Past or Current                      | 1015                              | 1.25 (1.07 - 1.46)  |
| <b>Work ETS exposure ¶</b>           |                                   |                     |
| None                                 | 953                               | 1.00                |
| Past or Current                      | 367                               | 1.24 (1.09 - 1.41)  |

\* All ORs are adjusted for age, gender, and dialect group plus adult ETS variables as indicated in subsequent footnotes.

† ORs adjusted for adult home (no, 1 past, 2+ past, 1+ current smokers) and work (no, past or current) exposure.

‡ Number of smokers for childhood and adult ETS exposure is a semi-quantitative variable representing the minimum number of smokers.

§ ORs adjusted for childhood (no, 1, 2, 3+ smokers) and work (no, past or current) exposure.

¶ ORs adjusted for childhood (no, 1, 2, 3+ smokers) and adult home (no, 1 past, 2+ past, 1+ current smokers) exposure.

Appendix 3 Respiratory symptoms in relation to maternal smoking during early life versus smoking by others.

|                                    | No Cough,<br>Phlegm, or<br>Asthma |     | Asthma Diagnosis |    | Chronic Bronchitis * |     | Chronic Phlegm  |     | Chronic Cough   |  |
|------------------------------------|-----------------------------------|-----|------------------|----|----------------------|-----|-----------------|-----|-----------------|--|
|                                    | N                                 | N   | OR (95% CI) †    | N  | OR (95% CI)          | N   | OR (95% CI)     | N   | OR (95% CI)     |  |
| <b>Childhood home ETS exposure</b> |                                   |     |                  |    |                      |     |                 |     |                 |  |
| None                               | 11011                             | 473 | 1.00             | 36 | 1.00                 | 183 | 1.00            | 36  | 1.00            |  |
| Maternal Smoking ‡                 | 5882                              | 290 | 1.03(0.87-1.23)  | 40 | 1.45(0.87-2.42)      | 133 | 1.07(0.83-1.38) | 43  | 2.22(1.33-3.69) |  |
| Other Smoking §                    | 14249                             | 741 | 1.09(0.95-1.26)  | 73 | 1.08(0.68-1.70)      | 384 | 1.32(1.07-1.62) | 106 | 2.11(1.36-3.28) |  |

\*Chronic bronchitis was defined as combined chronic cough and phlegm.

†ORs adjusted for age, gender, dialect group, adult home (no, 1 past, 2+ past, 1+ current smokers) and work (no, past or current) exposure.

‡ Individuals who lived with a smoking mother were included in this category regardless of who else smoked. It was uncommon to have a mother who smoked without a father or others who smoked.

§ Individuals who were not exposed to maternal smoking but were exposed to smoking by others were included in this category.
